# Supplementary material for: 10 Be systematics in the Tsangpo-Brahmaputra catchment: the cosmogenic nuclide legacy of the eastern Himalayan syntaxis
Source: Copernicus journal article supplement (doi:10.5194/esurf-2017-18), 2017-04-06
Supplement: Supplementary file 1 [file Cosmo_Tsangpo_STables.xlsx]

## Sheet: Table S1
Sample	Grain-size (µm)	River	Locality	Sample location	Sampling date	Lat (°N)	Lon (°E)	AMS facility	AMS number	Quartz (g)	9Be carrier (µg)	9Be natural (µg)	9Be total (µg)	9Be uncertainty (%)	Procedural blank	blank corrected 10Be/9Be (a)	Uncertainty (%)	Standardization	10Be (at/g)	Uncertainty (%)	Catchment mean elevation (m)	Catchment total surface (km2)	Catchment total glacier surface (km2)	Catchment mean 10km relief (m)	Catchment mean slope (°)	Catchment-wide neutron scaling factor	Catchment-wide muon scaling factor	Catchment-wide denudation rate (mm/yr)	Absolute uncertainty (mm/yr)	Integration time (kyr)	Sediment flux (Mt/yr)	Aboslute uncertainty (Mt/yr)
This study
Tsa-1-A	250-500	Tsangpo	-	1	2006-11-04	29.3576	88.4983	ASTER	-	35.8013	300	-	300	2	7.99e-15	2.2123e-12	2.18288	NIST_27900	1240400	2.96056	5100	79700	1900	1000	13.7883	19.5945	5.93675	0.040749	0.00902491	16.144	10	1.94207
Tsa-13	250-500	Tsangpo	-	2	2006-11-09	29.3229	94.357	ASTER	-	25.041	303	-	303	2	7.99e-15	1.34353e-12	2.09852	NIST_27900	1087800	2.89893	4900	185400	3500	1100	16.3972	18.266	5.65592	0.043394	0.010305	18.346	20	5.15848
Tsa-16	250-500	Tsangpo	-	3	2006-11-09	29.5218	94.8842	ASTER	-	9.863	100.86	-	100.86	2	2.19182e-15	4.39758e-13	4.5	NIST_27900	909000	4.5	4900	204900	3500	1100	16.5138	18.1539	5.63139	0.0516175	0.0135623	11.5	30	7.5031
Tsa-18	250-500	Nyang	-	b	2006-11-10	29.7076	94.3336	ASTER	-	26.3091	301	-	301	2	7.99e-15	2.48524e-13	3.59226	NIST_27900	190300	4.11149	4700	16200	1200	1700	26.7069	17.0337	5.39457	0.231798	0.0592789	2.568	10.1389	2.59286
Tsa-4	250-500	Kyi	-	a	2006-11-04	29.449	90.9292	ASTER	-	25.1439	301	-	301	2	7.99e-15	7.12364e-13	1.9732	NIST_27900	570600	2.80954	4900	32300	700	1200	18.9382	18.4513	5.6951	0.0835404	0.0196515	10.114	10	1.71381
Tsa-12	250-500	Rong Chu	-	c	2006-11-08	29.9942	94.93	ASTER	-	22.274	303	-	303	2	7.99e-15	3.69122e-14	15.6382	NIST_27900	33600	15.7656	4300	2700	200	2000	26.6628	13.1714	4.56328	1.023	0.395666	0.556	10	2.8844
Tsa-9	250-500	Yigong	-	d	2006-11-08	30.1243	95.0524	ASTER	-	30.1028	304	-	304	2	7.99e-15	2.8246e-14	16.8004	NIST_27900	19100	16.919	4800	13400	3300	2100	27.6553	16.9538	5.33487	2.29813	0.695081	0.256	80	25
Tsa-8	250-500	Parlung	-	e	2006-11-07	30.0397	95.2433	ASTER	-	27.1379	304	-	304	2	7.99e-15	3.12632e-14	9.84175	S2007N	23400	10.0429	4400	9700	2300	2200	27.3898	13.5837	4.62782	1.51065	0.507449	0.295	39.564	15
BRM 1410	125-250	Siang	Tuting	5	2014-04-02	28.9968	94.9025	TANDY	TB1582	34.6046	258	-	258	2	3.75e-15	2.46971e-13	3.5542	S2007N	123200	4.07827	4800	241600	11400	1300	18.8453	17.4428	5.46822	0.366226	0.0914509	1.614	240	59.6553
BRM 1410	250-500	Siang	Tuting	5	2014-04-02	28.9968	94.9025	TANDY	TB1583	41.1369	257.3	1.86871	259.169	0.721041	3.75e-15	2.36583e-13	3.92375	S2007N	99700	3.98945	4800	241600	11400	1300	18.8453	17.4428	5.46822	0.452448	0.113487	1.307	300	75
BRM 1419	250-500	Siang	Dite Dime	6	2014-04-04	28.3579	95.0631	TANDY	TB1584	33.8447	258.1	-	258.1	2	3.75e-15	9.46511e-14	5.23151	S2007N	48300	5.60077	4700	246600	11400	1400	19.0358	17.1663	5.39924	0.91966	0.235346	0.643	610	160
BRM 1419	500-1000	Siang	Dite Dime	6	2014-04-04	28.3579	95.0631	TANDY	TB1585	38.8314	258.5	1.16996	259.67	0.450558	3.75e-15	1.04945e-13	5.11259	S2007N	47000	5.1324	4700	246600	11400	1400	19.0358	17.1663	5.39924	0.945903	0.241506	0.625	629.801	160
BRM 1417	250-500	Siang trib.	-	p	2014-04-03	28.7766	94.7678	ASTER	-	19.18	300	-	258.889	0.922896	2.35191e-15	2.2029e-14	10.6	NIST_27900	20600	10.923	1635.24	144.172	0	1934.99	21	2.85118	1.73397	0.386211	0.234164	15.3	0.150159	0.1
BRM 1418	250-500	Siang trib.	-	q	2014-04-03	28.7805	94.8084	ASTER	-	19.13	305	-	207.234	0.788502	2.35191e-15	1.72728e-14	12.01	NIST_27900	17807.3	9.50115	1485.81	128.304	0	1796	22	2.53351	1.6168	0.449594	0.246851	13.2	0.15538	0.2
BRM 1420	250-500	Siang trib.	Boleng	r	2014-04-04	28.3343	94.9583	ASTER	-	19.26	304	-	248.263	0.709939	2.35191e-15	1.91905e-14	9.1	NIST_27900	15841.2	12.3928	1357.18	549.35	0	1945.16	19	2.34945	1.53461	0.372268	0.225951	15.9	0.551813	0.4
BR 1224	250-500	Siang	Pangin	7	2012-08-12	28.236	94.9982	TANDEM	ZB9324	60.7597	256.5	2.38928	258.889	0.922896	3.75e-15	7.39496e-14	8.94343	S2007N	21100	8.99092	4700	253100	11400	1400	19.0611	17.114	5.38557	2.10087	0.558426	0.281	1440	380
BR 1224 dup.	250-500	Siang	Pangin	7	2012-08-12	28.236	94.9982	TANDY	TB1365	41.554	205.6	1.63404	207.234	0.788502	3.75e-15	7.33482e-14	7.59532	S2007N	24500	7.63614	4700	253100	11400	1400	19.0611	17.114	5.38557	1.80908	0.474465	0.327	1240	320
BR 1224	500-1000	Siang	Pangin	7	2012-08-12	28.236	94.9982	TANDEM	ZB9333	60.7101	246.5	1.76251	248.263	0.709939	3.75e-15	2.2895e-13	6.21745	S2007N	62700	6.25785	4700	253100	11400	1400	19.0611	17.114	5.38557	0.706884	0.182178	0.836	480	130
BR 1224 dup.	500-1000	Siang	Pangin	7	2012-08-12	28.236	94.9982	TANDY	TB1364	40.804	204.2	1.18461	205.385	0.576775	3.75e-15	1.43437e-13	4.96383	S2007N	48300	4.99723	4700	253100	11400	1400	19.0611	17.114	5.38557	0.91671	0.234792	0.645	630	160.45
BR 1223	250-500	Siang	Pasighat	8	2012-08-11	28.0987	95.2948	TANDEM	ZB9323	62.4067	254.5	2.3013	256.801	0.89614	3.75e-15	2.2665e-13	8.349	S2007N	62400	8.39695	4700	254900	11400	1400	19.0611	17.114	5.38557	0.709602	0.187684	0.833	490	130
BRM 1405	250-500	Siang	Pasighat	8	2014-03-31	28.1022	95.2883	TANDY	TB1581	40.0657	256.6	2.04187	258.642	0.78946	3.75e-15	2.18901e-13	4.88272	S2007N	94600	4.94613	4600	254900	11400	1400	19.2647	17.114	5.38557	0.457145	0.120175	1.293	320	90
BR 1226	125-250	Siyom	Jining	f	2012-08-12	28.2188	94.8637	TANDEM	ZB9325	60.4384	255	1.90873	256.909	0.742961	3.75e-15	8.28496e-14	8.66762	S2007N	23600	8.6994	2200	5600	0	2100	25.557	4.941	2.33931	0.565691	0.498283	1.045	10	10
BR 1205	250-500	Dibang	-	g	2012-08-09	27.8106	95.5851	TANDEM	ZB9321	60.8148	253.3	0.743308	254.043	0.292591	3.75e-15	2.27496e-14	16.1884	S2007N	6400	16.1911	2900	12200	200	2200	28.4782	6.82808	2.90587	2.86039	2.08436	0.207	90	70
BRM 1404	125-250	Dibang	-	g	2014-03-31	27.8945	95.6163	TANDY	TB1579	39.829	259.9	0.64397	260.544	0.247164	3.75e-15	1.23773e-14	17.3468	S2007N	5400	17.3486	2900	12200	200	2200	28.4782	6.82808	2.90587	3.35647	2.52025	0.176	110	90
BR 1208	500-1000	Lohit	Dholla Ghat	h	2012-08-09	27.7997	95.6493	TANDEM	ZB9331	40.1314	252.9	-	252.9	2	3.75e-15	2.95496e-14	17.6167	S2007N	12500	17.7299	3600	24300	2500	2300	27.253	9.70582	3.61493	2.0468	1.09519	0.289	130	80
BRM 1401	250-500	Lohit	Dholla Ghat	h	2014-03-30	27.8014	95.6116	TANDY	TB1578	39.9743	255.8	0.396744	256.197	0.154859	3.75e-15	2.28844e-14	11.3401	S2007N	9800	11.3411	3600	24300	2500	2300	27.253	9.70582	3.61493	2.5997	1.22997	0.227	170	80
BR 1231	250-500	Kameng	Bridge	k	2012-08-13	26.8082	92.874	TANDEM	ZB9326	60.9912	255.5	3.98648	259.486	1.5363	3.75e-15	3.93496e-14	11.2845	S2007N	11200	11.3886	2100	9700	300	2000	24.6497	4.22149	2.10554	1.02328	1.07672	0.578	30	30
BRM 1425	250-500	Kameng	Dhalaibil	k	2014-04-06	26.8096	92.8753	TANDY	TB1587	39.246	256.5	11.8672	268.367	4.42199	3.75e-15	2.42348e-14	11.2317	S2007N	11100	12.0708	2100	9700	300	2000	24.6497	4.22149	2.10554	1.03343	1.10151	0.572	30	30
BRM 1425	500-1000	Kameng	Dhalaibil	k	2014-04-06	26.8096	92.8753	TANDY	TB1588	40.3723	256.8	24.6586	281.459	8.761	3.75e-15	2.54625e-14	11.8601	S2007N	11900	14.7451	2100	9700	300	2000	24.6497	4.22149	2.10554	0.964708	1.06999	0.613	30	30
BR 1228	250-500	Subansiri	Bridge	j	2012-08-13	27.4453	94.2542	TANDEM	ZB9334	60.6673	251.1	38.12	289.22	13.1803	3.75e-15	3.51496e-14	10.8377	S2007N	11200	17.0639	3100	26100	600	1900	24.1162	8.87232	3.31046	2.08003	1.19938	0.284	150	90
BRM 1423	500-1000	Subansiri	Gogamukh	j	2014-04-05	27.4492	94.2506	TANDY	TB1586	40.1912	256.9	20.3667	277.267	7.34552	3.75e-15	1.14407e-14	21.0494	S2007N	5300	22.2943	3100	26100	600	1900	24.1162	8.87232	3.31046	4.41612	2.93643	0.134	310	210
BRM 1428	125-250	Manas	Barpeta	l	2014-04-07	26.495	90.9162	TANDY	TB1589	40.8677	256.3	28.8193	285.119	10.1078	3.75e-15	5.53485e-14	7.11922	S2007N	25800	12.3633	3700	28500	1200	2000	24.3422	10.7837	3.83608	1.09175	0.478079	0.542	80	40
BRM 1428	250-500	Manas	Barpeta	l	2014-04-07	26.495	90.9162	TANDY	TB1590	40.1005	256.4	35.3795	291.78	12.1254	3.75e-15	5.79818e-14	6.79777	S2007N	28200	13.9009	3700	28500	1200	2000	24.3422	10.7837	3.83608	0.999325	0.447653	0.592	80	40
BRM MANAS	125-250	Manas	-	l	2013	26.7826	90.9573	TANDY	TB1591	40.6362	257.1	54.9371	312.037	17.6059	3.75e-15	7.89336e-14	5.64712	S2007N	40600	18.4894	3700	28400	1200	2000	24.3486	10.7974	3.84007	0.696404	0.344435	0.849	50	30
BRM MANAS	250-500	Manas	-	l	2013	26.7826	90.9573	TANDY	TB1592	40.7165	254.3	59.4745	313.775	18.9545	3.75e-15	6.83613e-14	9.15615	S2007N	35300	21.0502	3700	28400	1200	2000	24.3486	10.7974	3.84007	0.801309	0.42419	0.738	60	40
BR8244	125-250	Teesta	Kaunia	o	2008-09-08	25.7946	89.4334	TANDEM	ZB9133	58.7712	248.7	7.53145	256.231	2.93931	3.75e-15	2.72496e-14	14.2032	S2007N	8000	14.5042	3200	8200	600	2400	25.8692	8.4096	3.17323	2.78308	1.60423	0.212	60	40
BR 1202	125-250	Buri Dihing	-	i	2012-08-08	27.3102	94.8831	TANDEM	ZB9330	40.948	251.9	-	251.9		3.75e-15	6.49496e-14	9.6607	S2007N	26700	9.6607	900	2500	0	1300	19	1.67836	1.23775	0.180748	0.442761	3.272	1.22005	2.98863
BR 1217	250-500	Brahmaputra	Dibrughar bg	9	2012-08-10	27.4203	94.7439	TANDEM	ZB9332	60.5435	252.8	2.05991	254.86	0.80825	3.75e-15	8.35496e-14	8.14658	S2007N	23500	8.18658	4400	293300	14100	1500	20.3193	15.4689	4.98087	1.70451	0.49443	0.347	1349.82	400
BR 1213	250-500	Brahmaputra	Dibrughar bg	9	2012-08-10	27.3785	94.7612	TANDEM	ZB9322	61.8463	257.7	1.92787	259.628	0.742551	3.75e-15	7.74496e-14	8.81053	S2007N	21800	8.84177	4400	293300	14100	1500	20.3193	15.4689	4.98087	1.84316	0.538831	0.321	1459.62	430
AR13	125-500	Brahmaputra	Tezpur	10	1999	26.6109	92.853	TANDEM	ZB9132	59.5023	261.1	1.90774	263.008	0.725356	3.75e-15	8.36496e-14	7.73344	S2007N	24700	7.76739	4100	348300	14900	1500	20.5823	13.7877	4.53922	1.44774	0.470854	0.408	1360	450
BR66	125-500	Brahmaputra	Tezpur	10	2001-07-29	26.6109	92.853	TANDEM	ZB9135	39.8527	245.4	-	245.4		3.75e-15	6.78496e-14	17.0627	S2007N	28000	17.0627	4100	348300	14900	1500	20.5823	13.7877	4.53922	1.28101	0.484613	0.462	1210	460
BR 1233	125-250	Brahmaputra	Tezpur	10	2012-08-13	26.6115	92.858	TANDEM	ZB9327	60.7756	257.5	7.95023	265.45	2.995	3.75e-15	1.2635e-13	8.79304	S2007N	36900	9.28911	4100	348300	14900	1500	20.5823	13.7877	4.53922	0.969863	0.317347	0.61	910	300
BR 506	250-500	Brahmaputra	Sirajganj	11	2005-07-22	24.4727	89.73	TANDEM	ZB9336	61.2647	252.6	6.2985	258.899	2.43281	3.75e-15	9.79496e-14	8.99563	S2007N	27700	9.31879	3800	424600	16800	1600	20.8047	12.5944	4.2315	1.18325	0.424743	0.5	1360	490
BR 706	63-125	Brahmaputra	Jammuna bg	11	2007-08-16	24.4079	89.7987	TANDEM	ZB9335	39.6443	252.4	5.34847	257.748	2.07507	3.75e-15	8.25496e-14	8.87645	S2007N	35900	9.11577	3800	424600	16800	1600	20.8047	12.5944	4.2315	0.912724	0.328564	0.648	1040	380
BR706	125-250	Brahmaputra	Jammuna bg	11	2007-08-16	24.4079	89.7987	TANDEM	ZB9134	59.6409	251.7	4.93571	256.636	1.92323	3.75e-15	9.12496e-14	8.51377	S2007N	26300	8.72829	3800	424600	16800	1600	20.8047	12.5944	4.2315	1.24766	0.445363	0.474	1430.34	520
BR 8262	125-250	Brahmaputra	Jammuna bg	11	2008-09-12	24.3832	89.7964	TANDEM	ZB9136	41.9329	259.6	15.4376	275.038	5.61291	3.75e-15	9.45496e-14	8.59979	S2007N	41500	10.2694	3800	424600	16800	1600	20.8047	12.5944	4.2315	0.789781	0.28801	0.749	910	330.181
BR 8262	250-500	Brahmaputra	Jammuna bg	11	2008-09-12	24.3832	89.7964	TANDEM	ZB9328	61.8796	253.6	3.3192	256.919	1.29192	3.75e-15	1.0705e-13	8.44295	S2007N	29700	8.54122	3800	424600	16800	1600	20.8047	12.5944	4.2315	1.10208	0.392369	0.536	1260	449.82
BR 1015	125-250	Brahmaputra	Jammuna bg	11	2010-07-07	24.3844	89.7958	TANDEM	ZB9131	60.3402	272	5.36798	277.368	1.93533	3.75e-15	1.0085e-13	9.91005	S2007N	31000	10.0973	3800	424600	16800	1600	20.8047	12.5944	4.2315	1.05661	0.382609	0.56	1210	440
BR 1047	125-250	Brahmaputra	Jammuna bg	11	2010-07-09	24.3862	89.7966	TANDEM	ZB9128	59.9301	260.5	5.05319	265.553	1.90289	3.75e-15	1.6335e-13	11.4758	S2007N	48400	11.6325	3800	424600	16800	1600	20.8047	12.5944	4.2315	0.676769	0.250306	0.874	780	290
Literature data - Finnegan et al., 2008
MEDOC	250-500	Siang	-	4	2002-05-01	29.3264	95.3115	-	-	-	-	-	-	-	-	-	-	-	157450	3.1	4800	239300	11300	1300	18.7471	17.5636	5.49769	0.288531	0.071305	1.842	190	50
NB-3-04	250-500	Parlung East	-	e	2002-05-01	30.0956	95.0662	-	-	-	-	-	-	-	-	-	-	-	22350	4.3	4400	10000	2300	2200	27.5183	13.4508	4.596	1.56858	0.504505	0.28	40	15
NB-4-04	250-500	Yigong	-	d	2002-05-01	30.0967	95.0647	-	-	-	-	-	-	-	-	-	-	-	19640	4	4800	13500	3300	2100	27.6722	16.9256	5.32856	2.23015	0.575126	0.263	80	20
NB-5-04	250-500	Upper Rong Chu Nord	-	c	2002-05-01	29.9454	94.8035	-	-	-	-	-	-	-	-	-	-	-	127550	3.7	4200	800	0	1800	22.4426	12.7651	4.48719	0.261522	0.0883799	1.582	0.564888	1
NB-6-04	250-500	Upper Rong Chu Sud	-	c	2002-05-01	29.9482	94.8006	-	-	-	-	-	-	-	-	-	-	-	23550	4	4300	1700	200	2100	28.0471	13.7185	4.68545	1.51822	0.477811	0.405	10	2.19315
NB-7-04	250-500	Nyang	-	b	2002-05-01	29.7099	94.3279	-	-	-	-	-	-	-	-	-	-	-	195660	2.6	4700	16200	1200	1700	26.7087	17.0368	5.39529	0.225442	0.0571978	2.637	9.86083	2.50183
NB-8-04	250-500	Tsangpo	-	3	2002-05-01	29.6041	94.9369	-	-	-	-	-	-	-	-	-	-	-	390240	5.1	4900	204900	3500	1100	16.5138	18.1539	5.63139	0.120236	0.0289633	6.519	70	15
Literature data - Portenga et al., 2015
99-09-xfe	250-850	Tsang Chhu	-	m	1999	27.033	90.0738	-	-	-	-	-	-	-	-	-	-	-	38500	7.8	3500	7900	0	2200	23	9.92748	3.6413	0.678066	0.301048	0.874	15	6.38226
02-130-xfe	250-850	Tsang Chhu	-	m	2002	27.033	90.0738	-	-	-	-	-	-	-	-	-	-	-	39300	2.5	3500	7900	0	2200	23	9.92748	3.6413	0.664263	0.285488	0.892	15	6.05238
Literature data - Abrahami et al., 2016
TST-22	250-500	Teesta	-	n	-	26.8887	88.4762	-	-	-	-	-	-	-	-	-	-	-	14310	18.1	3200	8200	600	2400	25.9046	8.47567	3.19291	1.56156	0.966024	0.379	35	20

## Sheet: Table S2
Sample	Grain-size (µm)	Sample location	Quartz (g)	9Be carrier (µg)	Avg. 9Be content of Quartz (ppm)	stdev. 9Be content of Quartz (ppm)	% natural 9Be of added carrier
Tsa-1-A	250-500	1	35.8013	300	-	-	-
Tsa-13	250-500	2	25.041	303	-	-	-
Tsa-18	250-500	b	26.3091	301	-	-	-
Tsa-4	250-500	a	25.1439	301	-	-	-
Tsa-12	250-500	c	22.274	303	-	-	-
Tsa-9	250-500	d	30.1028	304	-	-	-
Tsa-8	250-500	e	27.1379	304	-	-	-
BRM 1410	125-250	5	34.6046	258	-	-	-
BRM 1410	250-500	5	41.1369	257.3	0.0454267	-	0.726278
BRM 1419	250-500	6	33.8447	258.1	-	-	-
BRM 1419	500-1000	6	38.8314	258.5	0.0301293	-	0.452597
BR 1224	250-500	7	60.7597	256.5	0.0393234	-	0.931493
BR 1224 dup.	250-500	7	41.554	205.6	0.0393234	-	0.794769
BR 1224	500-1000	7	60.7101	246.5	0.0290316	-	0.715015
BR 1224 dup.	500-1000	7	40.804	204.2	0.0290316	-	0.580121
BR 1223	250-500	8	62.4067	254.5	0.0368759	-	0.904244
BRM 1405	250-500	8	40.0657	256.6	0.0509631	-	0.795742
BR 1226	125-250	f	60.4384	255	0.0315814	-	0.748522
BR 1205	250-500	g	60.8148	253.3	0.0122225	0.000400731	0.29345
					0.0122322
					0.0120566
					0.0117973
					0.0121356
					0.0129831
					0.0121301
BRM 1404	125-250	g	39.829	259.9	0.0161684	-	0.247776
BR 1208	500-1000	h	40.1314	252.9	-	-	-
BRM 1401	250-500	h	39.9743	255.8	0.00992497	-	0.155099
BR 1231	250-500	k	60.9912	255.5	0.0653617	-	1.56027
BRM 1425	250-500	k	39.246	256.5	0.351231	0.506857	5.37403
					0.936461
					0.0527954
					0.0644359
BRM 1425	500-1000	k	40.3723	256.8	0.211069	0.238891	3.31828
					0.112888
					0.0369133
					0.483407
BR 1228	250-500	j	60.6673	251.1	1.06268	0.323019	25.6751
					0.985971
					1.41715
					0.784926
BRM 1423	500-1000	j	40.1912	256.9	0.0586565	0.0364472	0.917662
					0.0394265
					0.0358514
					0.100691
BRM 1428	125-250	l	40.8677	256.3	0.922452	0.368703	14.7087
					0.790758
					1.33892
					0.637679
BRM 1428	250-500	l	40.1005	256.4	0.0377891	0.0124759	0.591014
					0.0299209
					0.0312724
					0.0521739
BRM MANAS	125-250	l	40.6362	257.1	1.24315	0.441685	19.6488
					1.23174
					0.807283
					1.69043
BRM MANAS	250-500	l	40.7165	254.3	1.4607	0.956909	23.3876
					2.13733
					0.784061
BR8244	125-250	o	58.7712	248.7	0.128149	-	3.02833
BR 1202	125-250	i	40.948	251.9	-	-	-
BR 1217	250-500	9	60.5435	252.8	0.0340236	-	0.814836
BR 1213	250-500	9	61.8463	257.7	0.031172	-	0.748106
AR13	125-500	10	59.5023	261.1	0.0320616	-	0.730655
BR66	125-500	10	39.8527	245.4	-	-	-
BR 1233	125-250	10	60.7756	257.5	0.130813	-	3.08747
BR 506	250-500	11	61.2647	252.6	0.102808	-	2.49347
BR 706	63-125	11	39.6443	252.4	0.134911	-	2.11905
BR706	125-250	11	59.6409	251.7	0.0827571	-	1.96095
BR 8262	125-250	11	41.9329	259.6	0.36815	-	5.94669
BR 8262	250-500	11	61.8796	253.6	0.0536396	0.0319631	1.30883
					0.032437
					0.0380785
					0.0904034
BR 1015	125-250	11	60.3402	272	0.088962	-	1.97352
BR 1047	125-250	11	59.9301	260.5	0.0843181	-	1.93981
BRM 1417	250-500	p	19.18	300	-	-	-
BRM 1418	250-500	q	19.13	305	-	-	-
BRM 1420	250-500	r	19.26	304	-	-	-
